# Supplementary material for: Sarcopenia and echocardiographic parameters for prediction of cardiovascular events and mortality in patients undergoing maintenance hemodialysis
Source: PeerJ. 2022 Nov 23;10:e14429. doi: 10.7717/peerj.14429 (PMC9700452; doi:10.7717/peerj.14429)
Supplement: Supplemental Information 1 — CVD, cardiovascular disease; BMI, body mass index; HB, hemoglobin; PTH, parathyroid hormone; HDL-C, high-density lipoprotein cholesterol; LDL-C, low-density lipoprotein cholesterol; CRP, C-reactive protein; Kt/V, a measure of dialysis adequacy; K, dialyzer clearance of urea; t, dialysis time; V, volume of urea distribution. [file peerj-10-14429-s001.xls]

## Sheet: Sheet1
ID	Number	Sex	Age	LA	RV	IVS	LV	LVPW	RWT	LVM	LVMI	LVH	PA	RA	MV（E）	AV	TR	PG	PV	SMM	BMI	SMI	Handgrip, kg	Walk speed (m/s)	sarcopenia	EF	MV（E）	E/A	e'	e'/a'	E/e'	LVDD, left ventricle diastolic dysfunction	Time of dialysis, year	Hypertension,n	Diabetes mellitus, n	Prevalent cerebrovascular disease	Prevalent CVD, n	On antihypertensive treatment,n	On antihypertensive treatment,	Smoking	HB, g/L	PTH	CRP	Albumin, g/L	Pre-albumin, g/L	尿素（前）	尿素（后）	肌酐（前）	肌酐（后）
210309-21	1	male	61	4.5	2.7	0.9	5	1.11	0.444	183.201	112.63	0	2.4	4.2	1.2	1.8	2.2	20	1.2	25.3	22.1	6.8	33.9	0.835	0	0.57	1.2	<1		<1		1	3	1	1	0	0	0	0	1	108	21.06	17.5	40.1	0.27	15	6.1	717	229
210222-17	2	male	26	4.05	2.7	1.15	5.5	1.15	0.418182	257.003	126	1	2.5	4.2	0.75	1.25	0.74		0.9	36.4	28.2	8.4	41.2	1.068	0	0.74	0.75	>1				0	3	1	0	0	0	0	1	1	101	490.64		45.5	0.33	22.8		782
210317-05	3	male	48	4.2	2.75	1.2	5.5	1.2	0.436364	272.384	132.98	1	2.35	4.3	0.85	1.4	2.4	23	1	36.7	26.8	8.8	44	1.132	0	0.68	0.85	>1				0	6	0	1	0	1	0	0	0	105	250	0.98	43.4	0.36	25	15.2	1270	1059
210219-9	4	male	27	4.28	3.3	1.2	5.27	1.27	0.481973	264.612	142.75	1	3	3.97	0.81	1.32	2.29	21	1.02	30.7	23.9	7.3	32.1	1.054	0	0.76	0.81	>1				0	9	1	0	0	0	0	1	1	138	186.19		43.6	0.34	17.1		825
210220-10	5	male	60	4.5	3.1	1.02	6.5	1.11	0.341538	306.868	185.11	1	2.9	4.7	1.05	1.2	3.6	52	0.72	31.7	21.4	8.4	28.6	1.11	0	0.31	1.05			<1		0	11	1	0	0	1	0	0	1	110	803.5	10.1	35.4	0.23	19.5	10.4	781	438
210205-16	6	male	64	4.4	2.8	1.3	5.2	1.1	0.423077	248.842	140.86	1	3	4.4	0.77	1.39			1.3	30.8	26.8	8.4	29.8	0.745	0	0.79	0.77	1	0.05	<1	15	0	5	1	0	0	0	0	0	1	122	262.56	2.25	43.4	0.28	28.5		981
210317-27	7	male	67	3.85	2.1	1.35	4.5	1.35	0.6	235.326	149.2	1	2	4.2	0.5	1.4	2.65	28	1.1	23.3	17.6	5.9	52.7	0.685	1	0.8	0.5	<1	0.05	<1	10	1	1	1	1	0	1	0	1	0	106	114.59	10.3	37.3	0.19	16.9	9.4	484	304
210223-8	8	male	74	3.3	2.3	1.1	4.5	1.1	0.488889	175.019	109.7	0	2.6	3.5	0.8	2.1	2.6	27	0.8	21.8	17.3	5.7	19.7	0.716	1	0.7	0.8	<1	0.05	<1	16	1	3	1	1	0	0	0	0	1	121	67.18	1.56	41.1	0.23	22.6	7.2	749	292
210225-21	9	male	36	3.2	2.1	0.88	3.9	0.82	0.420513	97.3591	53.67	0	2.3	3.2	0.9	1			0.6	30.4	19.8	7.3	40.5	1.229	0	0.7	0.9	>1		>1		0	5	1	0	0	0	0	0	1	112	238.12	2.85	40.3	0.37	36.6		1513
210309-20	10	male	66	3.72	2.01	1.2	4.93	0.9	0.365112	189.968	111.83	0	2.79	4.1	0.57	1.36	2.57	26	0.97	26.6	21.2	6.8	20.4	0.848	1	0.57	0.57	<1		<1		1	12	1	1	0	1	0	1	0	120	106.72	6.78	40.7	0.35	35.4	12.6	1156	451
210220-13	11	male	62	3.6	2.4	1.26	4.6	1.2	0.521739	212.394	122.94	1	2.07	3.5	0.72	1.38	2.9	33	1.12	25.5	22	6.8	27.7	1.1	1	0.62	0.72	<1	0.06	<1	12	1	9	1	0	1	1	0	1	0	104	47.5		38.7	0.18	13.3	4.9	882	330
210301-6	12	male	56	4.1	2.47	1.37	4.8	1.22	0.508333	244.369	159.11	1	1.12	4.05		1.82	3.32	44.1	1.12	22.9	24.1	6.9	19.4	0.772	1	0.673		<1				1	5	1	0	0	0	0	1	1	101	352.41				20.2	6.9	847	357
210225-26	13	male	50	5.19	3.06	1.38	5.4	1.24	0.459259	298.777	160	1	3.12	4.51	1.04	3.3	1.99	44	1.4	33.7	25.2	8.5	22.3	0.567	1	0.61	1.04	<1	0.05	<1	20.8	1	14	1	0	0	1	0	0	1	101	537.54	2.15	37.6	0.21	34.5		1056
210311-22	14	male	66	4.41	2.62	1.28	5.5	1.23	0.447273	289.759	164.62	1	2.9	3.79	0.58	3.71	2.26	20	0.67	27.8	23	6.9	12.7	0.614	1	0.58	0.58	<1		<1		1	13	1	0	0	1	0	1	1	125	1190.1		37.2	0.3	20.8	8.1	697	310
210315-9	15	male	30	3.8	2.3	1.05	5.2	1.07	0.411538	209.944	119.16	1	2	4	1	1.47	2.4	23	1.12	32.1	21.2	7.6	37.7	1.345	0	0.68	1	>1	0.09	>1	11	0	7	0	0	0	0	0	0	1	101	155.35		46	0.34	12		756
210316-05	16	male	57	3.8	2.2	1.01	5.3	0.93	0.350943	192.481	122.71	1	1.9	3.1	1.28	1.82	3.59	51	1.06	22.5	20.2	6.3	21.9	1.315	1	0.7	1.28	>1		<1		0	7	1	0	0	0	0	0	1	100	563.58		33.6	0.25	26.8	7.9	849	335
210226-18	17	male	56	3.5	2.6	1.12	4.6	1	0.434783	172.099	94.96	0	2.8	4.9	1	1.3	2.9	34	0.8	26.8	23.4	7	35.1	0.972	0	0.7	1	1		<1		0	10	1	0	0	0	0	0	1	118	79.21		42.7	0.31	20.9		1047
210225-24	18	male	43	3.9	2.6	0.95	4.5	1.1	0.488889	158.585	81.13	0	2.9	4.1	0.69	1.15	2.3	21	0.66	29.4	26.1	7.3	32.4	0.933	0	0.67	0.69	>1		<1		0	18	1	0	0	0	0	0	0	125			41.5	0.35	25.8		1020
210310-04	19	male	68	3.7	2.3	1.04	5.3	1.07	0.403774	215.249	130.83	1	2.6	4.4	0.93	1.36	2.8	31	1	22.6	22.3	6.2	18.4	0.857	1	0.63	0.93	<1				1	4	1	0	0	0	0	1	0	124	228.61		43.5		20.7	5.2	976	308
210223-21	20	male	57	4.3	2.7	1.1	5.2	1	0.384615	207.276	116.16	1	2	3.4	0.6	1.4	2.7	29	1.1	29.5	24.4	8	26.7	0.837	0	0.68	0.6	<1		<1		1	6	1	1	0	0	0	0	0	102	838.58	1.87	40.2	0.29	24.9	7.1	1289	412
210312-6	21	male	66	5.8	2.3	1.06	6.4	0.86	0.26875	261.67	130.56	1	2.6	3.8	1.46	1.42	3.8	57	0.96	34	25.5	7.9	30.6	1.271	0	0.37	1.46	>1		<1		0	9	1	0	0	0	0	0	1	125	276.83	5.37	42.2	0.34	24.4	9.5	907	406
210205-4	22	male	68	4.3	2.5	1.47	5	1.1	0.44	257.52	135.97	1	2.25	4.3	0.62	1.47				30.6	26.4	7.8	29.2	0.93	0	0.69	0.62	<1		<1		1	1	0	0	0	0	0	0	1	102	95.43	48.8	39.2	0.31	18.3		514
210224-14	23	male	63	4.3	2.65	1.1	5.6	1.1	0.392857	249.315	151.16	1	2.78	3.49	0.81	1.18			0.85	28.8	20.7	8.1	35	0.932	0	0.58	0.81	1	0.059	<1	13	0	0	1	1	0	1	0	0	0	101	549.31	32.08	35.2	0.23	18.2	8.3	628	307
210226-14	24	male	73	4	2.29	1	4.4	0.89	0.404545	136.777	76.23	0	2.35	4.02	1.34	1.82	3.27	43	1.32	25	24.6	6.7	22.1	0.721	1	0.8	1.34	<1	0.041	<1	19.5	1	4	0	1	0	1	0	0	1	129	31.3	10.5	43.4	0.21	20.7		597
210310-18	25	male	57	4.85	3.1	1.35	5.59	1.35	0.483005	329.278	154.75	1	3	4.49	0.54	1.38	2.4	23	0.86	35.5	31.4	8.6	21.9	0.557	0	0.67	0.54	<1	0.04	<1	14	1	19	1	1	0	0	0	0	1	106	227.01		36.3	0.23	28.1	10.6	987	512
210205-6	26	male	39	3.52	2.87	0.98	4.9	1	0.408163	173.666	92.28	0	2.08	3.5	0.9	1.1				31.3	22.6	7.4	43.5	0.706	0	0.63	0.9	>1		>1		0	15	0	0	0	1	0	1	0	127	411.1	0.35	40.5	0.37	28.5		1166
210219-18	27	male	57	3.5	2.6	0.73	4.8	0.85	0.354167	124.653	80.55	0	2.6	3.9	0.6	1.1	2.5	25	1.1	22.1	20.7	6	25.5	0.78	1	0.71	0.6	<1	0.1	>1	6	1	7	1	0	0	0	0	1	1	98	330.8		41.8	0.23	6.22		761
210312-10	28	male	38	5.72	2.73	1.33	5.72	1.34	0.468531	336.262	215.57	1	2.54	3.91		1.21	3.24	42	0.95	28.4	20.2	7.8	28.1	0.778	0	0.34		>1				0	4	1	1	0	0	0	0	1	105	145.3		44.8	0.34	35.2	19.2	1166	755
210317-19	29	male	29	4.1	2	1.23	5	1.22	0.488	240.627	117.37	1	2.6	4.5	0.9	1.4			1.2	34.1	25	8	44.1	1.127	0	0.7	0.9	1				0	1	1	0	0	0	0	0	1	107	322.1		39.1	0.32	19.6	7.5	1225	554
210222-8	30	male	36	3.7	1.9	0.9	4.7	0.84	0.357447	136.438	79.59	0	2.3	3.2	0.8	1.3			1.1	27.8	19.7	7	47.6	1.015	0	0.69	0.9	>1		>1		0	14	0	0	0	0	0	0	0	132	24.19		41.7	0.58	39.2		1252
210317-15	31	male	74	4.3	2.3	1.22	4.9	1	0.408163	203.022	113.67	0	3.2	5.2	0.7	1.2	3	36	0.8	23.6	24.8	6.7	35.4	0.66	1	0.56	0.7	<1				1	1	1	0	0	1	0	1	0	101	154.4	0.82	40.2	0.27	43.4	24.8	690	501
210224-12	32	male	31	2.8	2.2	0.9	4.85	0.9	0.371134	150.356	85.95	0	1.96	3.25	0.7	1.45			1.25	30	22.4	7.5	85.8	1.079	0	0.75	0.7	>1	0.1	>1	7	0	13	0	0	0	0	0	0	1	96	315.2		45.3	0.41	39		1542
210312-13	33	male	76	3.8	2.7	1.75	5.24	1.03	0.39313	310.081	169.49	1	2.5	4	0.85	1.8			1.1	26.3	23.9	7.1	19.8	0.587	0	0.7	0.85	<1		<1		1	1	1	1	0	0	0	0	1	95	46.37	0.731	36.1	0.23	17.6	8.6	373	196
210225-10	34	male	58	4.75	3.2	1.34	5.04	0.93	0.369048	219.078	126.66	1	3.02	4.3	1.1	1.48	3.47	48	0.86	24.7	19	6.7	18	1.051	1	0.53	1.1	>1	0.07	<1	16	1	16	1	0	1	1	0	1	0	106	21.01	8.13	34.1	0.19	20		398
210309-8	35	male	70	4.3	2.3	1.38	4.2	1.25	0.595238	204.044	101.71	0	2.7	4.3	0.6	1.6			1	28.9	29.3	7.8	25.6	0.538	0	0.6	0.6	<1		<1		1	6	1	1	1	0	0	1	1	141	518.91	1.18	38	0.26	20.6		944
210205-18	36	male	66	3.59	2.43	1.03	5.12	1.11	0.433594	207.302	136.52	1	2.12	3.57	0.64	1.39			1.03	24.9	20	6.7	36.2	0.757	1	0.79	0.64	<1	0.046	<1	14	1	9	0	0	0	0	0	1	1	94	3.9	34.8	33.5	0.21	31.8		796
210318-6	37	male	48	4.2	2.7	1	4.5	1	0.444444	153.272	94.91	0	2.2	3.7	0.5	1.36	2.7	29	1.3	27.8	23.1	7.4	25.8	1.047	0	0.73	0.5	<1	0.04	<1	13	1	0	1	0	0	0	0	0	1	72	112.43	0.94	35.7	0.24	45.2	33.5	1038	607
210319-18	38	male	75	4.9	2.5	1	5.8	1.1	0.37931	248.475	146.54	1	2.9	4.9	0.41	1	2.4	23	0.9	25.1	21.5	6.5	20.7	0.757	1	0.66	0.41	<1	0.035	<1	12	1	0	0	0	0	1	0	0	1	74	947.72	11.98	33.2	0.23	22.3	12.1	894	511
210303-2	39	male	58	2.9	2.3	0.84	4.4	0.85	0.386364	117.648	76.95	0	1.8	2.7	0.36	0.9	0.6		0.6	22.9	18	6.1	26.3	0.809	1	0.62	0.36	<1				1	7	1	1	0	1	0	0	1	111	300.93	0.781	39.1	0.3	20.7		719
210315-5	40	male	38	3.6	2.6	1.01	5	0.89	0.356	169.919	95.89	0	2.3	3.8	0.39	1.25	2.2	20	0.69	26.9	22.4	6.6	22.9	1.329	1	0.7	0.39	<1	0.06	<1	6.5	1	8	0	0	0	0	0	0	1	160	281.3		44.3	0.37	23.6		1166
210318-7	41	male	64	4.41	2.6	1.25	5.6	1.1	0.392857	272.534	134.49	1	3.03	4.12	0.51	1.31			0.78	34.8	28.3	8.5	27.8	0.66	0	0.78	0.51	<1	0.035	<1	15	1	3	1	0	0	1	0	1	0	113	192.1	4.79	40.2	0.25	17.3	8	512	286
210302-8	42	male	74	4.41	2.29	1.04	4.37	1.16	0.530892	167.116	98.75	0	2.37	4.24	0.87	1.59	2.65	28	1.21	24.6	21.9	6.5	10.9	0.228	1	0.68	0.87	<1				1	4	1	0	1	0	0	1	1	103	374.15				30		1036
210224-10	43	male	43	4.5	3	1.2	4.5	1.24	0.551111	202.884	119.13	1	2.7	4.1	0.8	1.4	3.1	38	1	29.3	21.8	7.7	71.2	1.168	0	0.61	0.8	>1		<1		0	5	1	0	0	0	0	1	1	112	877.64		40	0.33	29.8		1234
210224-25	44	male	47	3.4	2.45	0.9	5.2	0.9	0.346154	168.99	110.08	0	2.25	3.7	0.7	1.2				26.8	21.8	7.1	32.2	1.012	0	0.72	0.7	>1	0.1	>1	7	0	7	1	0	0	0	0	0	0	148			40.4		27.4		1156
210319-19	45	male	70	4	2.3	1.3	4.4	1.2	0.545455	203.046	115.12	1	2.7	3.9	0.6	1.4			0.8	27.4	25.4	7.4	27.4	0.599	0	0.72	0.6	<1	0.035	<1	17	1	0	1	0	1	0	0	0	1	102	94.72	6.97	38.7	0.34	19.7	9.5	492	265
210303-4	46	male	79	5.7	2.75	1	5.2	1	0.384615	194.156	111.73	0	2.4	5.4	0.9	1.05	3	36	0.8	25.5	25.3	7.2	19.2	0.681	0	0.5	0.9		0.069		13	0	3	1	0	0	1	0	0	1	112	124.75		42	0.24	30.4	10	918	336
210303-11	47	male	55	4.4	2.2	1.34	4.8	1.29	0.5375	249.851	133.88	1	2.5	3.4	0.5	1.4			1.3	28.6	28.5	7.7	21.6	0.858	0	0.6	0.5	<1		<1		1	3	1	0	0	1	0	1	0	109	9.27	4.2	41.1	0.32	24.4		756
210317-23	48	male	42	6.1	2.5	1.55	7.4	2	0.540541	755.813	337.31	1	3.8	5.7	1.6	1.7	3.3	44	1.5	38.8	34.4	9.8	33.5	0.696	0	0.45	1.6	>1		<1		0	3	1	0	0	0	0	1	1	100	151	0.82	48.9	0.35	24.8	10.1	859	325
210226-5	49	male	60	5.7	2.9	1.52	5.3	1.31	0.49434	323.824	187.78	1	3.4	5.4	1.1	1.9	2.6	28	0.8	28	21.1	7.2	30.8	0.824	0	0.7	1.1					0	8	1	0	0	0	0	0	1	114	829.78		38.2	0.22	21.1		931
210219-6	50	male	54	3.19	2.63	0.94	4.4	0.98	0.445455	139.754	95.18	0		3.43		0.84			0.76	22.6	18.8	6	22.8	0.702	1	0.668		<1				1	9	0	0	0	1	0	0	0	143	467.53		43.1		13.2		605
210219-11	51	male	57	3.24	2.62	0.87	5.4	1.04	0.385185	194.584	119.05	1	2.3	3.3	0.54	1.6	1.8	13	0.87	27.2	18.8	6.9	27.2	1.217	1	0.66	0.54	<1				1	5	0	0	0	0	0	0	1	116					30	7.1	653	228
210219-21	52	male	63	4.9	2.5	1.6	5.3	1.21	0.456604	320.533	187.22	1	2.4	4.4	1.4	1.9	3.5	48	1.5	29.6	21.6	7.3	32.6	1.036	0	0.7	1.4	>1		<1		0	7	1	0	0	0	0	0	1	96	224.56		40.7	0.41	33.3		1156
210315-21	53	male	71	3.9	2.2	1.37	4.8	1.22	0.508333	244.369	154.12	1	1.9	4.4	0.65	1.39	2.71	29	0.85	24.9	18.8	6.8	21.8	0.531	1	0.64	0.65	<1				1	3	1	0	1	0	0	0	1	52	176.7	0.82	36.7	0.32	15.3	14.2	608	526
210225-7	54	male	70	4.9	2.7	1.5	5.5	1.3	0.472727	337.903	185.79	1	2.65	3.9	0.8	1.2	2.5	25	1.2	31.3	24.3	8.1	39.3	0.954	0	0.79	0.8	<1	0.035	<1	22.8	1	3	1	1	0	0	0	1	1	116	348.51		44.2	0.32	29.9	9.4	1152	411
210302-4	55	male	49	4.7	2.5	1.25	6.1	1.1	0.360656	313.74	194.13	1	2.2	4	1.1	1.1	2.5	25	0.7	26.7	22	7.3	19.5	0.658	0	0.435	1.1	>1	0.06	<1	18	0	2	1	1	0	0	0	1	0	95	985.97		41.6	0.39	20.1		986
210309-15	56	male	62	5.6	2.9	1.32	4.7	1.36	0.578723	248.639	113.83	0	3.2	3.6	1	1.3			0.7	33.1	34.1	8.8	11.4	0.577	0	0.537	1	>1		<1		0	2	1	1	0	0	0	0	1	155	241.42	7.47	39.6	0.22	22.1	10.5	720	414
210303-13	57	male	38	5.5	2.7	1.5	5.7	1.3	0.45614	357.471	160.45	1	3	5.6	0.97	1.6			1	42.5	32.5	9.7	36.7	1.075	0	0.64	0.97		0.08		12	0	3	1	0	1	1	0	1	0	131	638.93	2.13	46.1	0.39	26.3	13.1	1456	835
210319-21	58	male	62	4.6	3.4	1.23	6.3	1.2	0.380952	346.123	208.57	1	3	5	1.2	1.9	3.4	45	0.9	30.8	20.3	8.2	32.4	0.767	0	0.4	1.2					0	1	1	0	0	1	0	0	0	71	167.84	2.86	39.3	0.27	20.8	17.1	787	521
210222-13	59	male	66	3.6	2	0.88	5.4	0.97	0.359259	186.647	133.38	1	2.3	3.8		1.05			0.75	17.8	16.9	5	16.6	0.831	1	0.72		<1				1	9	1	0	1	1	0	1	1	102	161.97		40.8	0.26	15.1	7.9	476	228
210219-10	60	male	48	5	3	1.6	5.7	1.45	0.508772	403.894	248.38	1	3	4.7	1.1	1.4	2.8	33	1.2	29.3	20	7.6	29.3	0.99	0	0.48	1.1	<1				1	8	1	0	0	1	0	1	1	122	273.35	1.62	39.4	0.24	23		873
210309-13	61	male	63	3.7	2.6	0.9	4.6	0.85	0.369565	132.648	85.64	0	2.2	3.88	0.73	1.25	2.4	22	0.96	21.8	18.1	5.8	27.1	1.637	1	0.71	0.73	<1	0.08	<1	9	1	8	1	0	0	0	0	1	0	108	375.2				24.6	7.1	714	246
210225-11	62	male	50	4.3	2.3	1.2	5.1	1.21	0.47451	242.64	126.39	1	2.2	3.8	0.5	1.3			0.8	30.8	22.3	7.2	9.9	1.043	0	0.8	0.5	<1	0.07	<1	7	1	26	0	0	0	1	0	1	1	115	547.7		37	0.2	19.9		921
210219-8	63	male	36	4.66	1.87	1.13	8.58	0.83	0.193473	449.278	306.26	1	2.54	3.31	0.77	1.29			0.94	24.3	16.1	6.3	24.7	0.92	1	0.27	0.77	<1	0.05	<1	15.4	1	15	1	0	0	1	0	1	1	133	781.97	1.11	44.9	0.43	17.7		811
210219-12	64	male	32	2.7	2.4	1.05	4.45	1.05	0.47191	161.085	96.48	0	2.5	3.1	0.6	0.8	2	16	0.7	26.4	18.5	6.6	32.5	0.945	0	0.74	0.6	1	0.062	1	10	0	10	1	0	0	0	0	1	1	92	115.72	0.83	42.7	0.36	30.7		1300
210303-12	65	male	50	4.4	2.5	1.2	4.9	1.2	0.489796	226.378	126.77	1	2.8	4.5	1.3	2	2.8	32	1.3	31.7	23.5	7.8	46.7	0.99	0	0.7	1.3	>1		<1		0	2	1	0	0	0	0	0	1	98	229.36	0.3	36.4	0.25	43.3		1020
210302-5	66	male	72	5.4	3.1	1.1	7	1.1	0.314286	363.092	197.6	1	3.2	5.5	1.3	1.6	3.2	41	0.6	28.5	23.1	7	19.7	0.832	0	0.31	1.3		0.035		3.7	0	4	1	1	1	1	0	0	1	97	69.3	8.16	39.7	0.23	24.4		432
210302-13	67	male	70	6.1	2.5	1.29	6.2	1	0.322581	311.462	160.78	1	3.1	4.2	1.5	1.5	3.5	49	1	26.2	24	6.6	37.3	0.916	0	0.67	1.5					0	2	1	0	1	0	0	0	1	104	71	34.84	41.2	0.22	20.7		627
210220-9	68	male	76	4.1	2.6	1.43	3.8	1.09	0.573684	164.973	105.57	0	2.5	3.9	0.6	1.4	3	35	1.1	23.5	20.8	6.2	17.6	0.731	1	0.69	0.6	<1				1	12	1	0	0	1	0	1	1	101	30.91	0.89	36.3	0.23	24.9		923
210309-23	69	male	47	4	2.5	1.05	6.1	1	0.327869	262.149	160.19	1	3.3	4.4	1.29	1.63	3.4	48	1.16	26.2	19.2	6.9	27.6	1.036	1	0.62	1.29	<1	0.063	<1	20	1	8	1	0	0	0	0	1	1	104	47.8					6.5		387
210223-18	70	male	56	4.5	3.4	1	5.3	1	0.377358	200.396	112.35	0	2.5	4.9	1.4	1.7	3.6	52	1.3	31.3	25.6	9	31.8	0.52	0	0.72	1.4	>1	0.05	>1	26	1	4	1	1	1	1	0	1	1	86	213.4	13.14	37.1	0.26	23.5	10	776	393
210311-18	71	male	42	4.2	2.8	0.8	5.6	0.9	0.321429	178.15	95.63	0	2.4	4.2	0.95	1.4			0.9	28.1	26	7.2	30.2	1.207	0	0.72	0.95	>1				0	19	1	0	0	1	0	0	0	145	406.32		41.5	0.34	23.5	11.3	941	463
210317-21	72	male	29	4.31	2.77	1.18	5.4	0.95	0.351852	224.819	119.54	1	2.53	3.71	1.25	1.64	2.89	33	1.24	31.1	22.9	7.3	50.6	1.415	0	0.69	1.25	>1				0	1	1	0	0	0	0	1	1	103	213.9	0.82	41.9	0.32	16.2	10.7	847	471
210222-18	73	male	45	5.1	3.1	1	5	0.8	0.32	158.207	95.66	0	2.2	3.5	0.6	1			0.8	27	20.1	6.7	47.6	0.982	0	0.67	0.6	<1		<1		1	13	1	0	0	1	0	1	0	115	856.43
210225-6	74	male	74	4.1	2.5	1.4	4.5	1.05	0.466667	204.088	96.88	0	2.4	4.3	0.6	1.2			0.9	29.7	31.9	8	38.3	0.946	0	0.68	0.6	<1		<1		1	5	1	1	1	1	0	0	1	119	545.6	15.76	36.7	0.28	27.8		1190
210225-12	75	male	53	3.9	2.5	1.1	4.4	1.1	0.5	168.924	102.72	0	2.5	4	0.7	1.4	2.4	23	0.8	26.5	22.8	7.2	14.7	0.939	0	0.77	0.7	<1	0.033	<1	21	1	24	0	0	1	0	0	0	0	123	85.41	0.79	37.6	0.26	21.3		1084
210226-13	76	male	88	5.1	2.7	1	5.7	1.1	0.385965	241.347	157	1	2.7	3.7	1.2	2.7	3.6	51	0.7	21.5	21.9	6	23.8	0.767	1	0.42	1.2	>1	0.0375	<1	32	0	4	1	0	0	1	0	0	1	111	238.5	4.49	29.8	0.16	29.5		669
210224-31	77	male	53	5.53	2.57	1.3	4.92	1.17	0.47561	237.294	147.55	1	2.9	4.49	1.48	4.22	4	64	1.05	28.2	19.6	7.3	30	0.85	0	0.67	1.48	<1		<1		1	23	1	0	0	1	0	1	1	90	1364.58	9.83	43.6	0.21	22.9		942
210303-10	78	male	61	5.5	3.3	1.3	5.3	1.2	0.45283	271.562	137.42	1	3.1	5.5	1	1	3.2	40	1	33.3	29.5	8.2	27	0.933	0	0.75	1		0.055		18	1	8	1	0	0	1	0	1	1	114	585.92		42.1	0.3	15.8		622
210208-8	79	female	54	4.1	2.8	1.17	4.4	1.08	0.490909	174.401	119.23	1	2.5	3.4	0.92	1.54	2.35	22	1.15	18.3	24.4	5.9	21.9	0.886	0	0.77	0.92	<1		<1		1	4	1	0	0	1	0	1	1	120	267.36	7.2	38.4	0.28	21	7.7	670	240
210226-15	80	female	41	3.4	2.1	0.8	4.65	0.95	0.408602	135.051	106.53	1	2	3.67	0.73	1.85	3.35	45	0.98	16.9	16.2	4.9	20.5	1.002	0	0.8	0.73	1	0.09	1	8	0	6	0	0	0	1	0	0	1	88	85.63	0.781	43.7	0.45	24.1		899
210219-7	81	female	69	3.1	2.2	1.3	3.8	1.07	0.563158	150.371	100.86	1	1.9	3.5	0.6	1.5			1.1	22.6	19.5	6.3	19.1	1.051	0	0.79	0.6	<1	0.06	<1	10	1	12	1	0	0	0	0	0	1	93	644.53	3.31	42.3	0.41	14.7		567
210303-3	82	female	54	3.5	2.1	0.85	4.9	0.93	0.379592	150.717	103.68	1	2.2	3.7	1	1.7			0.9	18.4	18.4	5.2	16.2	1.294	1	0.8	1	>1	0.06	<1	16	1	7	1	0	0	1	0	1	1	121	209.88				20.5	4.7	878	250
210303-6	83	female	44	3.5	2.5	1.05	4.6	1.04	0.452174	168.732	101.72	1	2.1	3.6	0.8	1.2			0.8	24.2	21.8	6.3	26	0.941	0	0.66	0.8	>1		>1		0	6	1	0	0	1	0	1	1	100	478.91	2.01	41.3	0.31	25.9		1130
210225-4	84	female	34	3.4	2.3	0.8	5	0.8	0.32	135.797	86.14	0	2.5	3.5	0.8	1	2.3	21	0.9	21.9	21.5	6.2	20.8	1.04	0	0.75	0.8	>1	0.09	<1	8.6	0	7	1	0	0	1	0	0	1	107	320.11	6.62	41.4	0.33	33.9	8	1173	327
210317-25	85	female	74	4.2	2.3	1.19	4.3	1.2	0.55814	183.566	114.93	1	2.5	3.8	1	1.6	2.1	17	1.2	23.7	21.9	6.4	15.9	0.707	0	0.77	1	<1		<1		1	0	1	1	1	1	0	0	1	82	82.6	65.33	38.8	0.26	16.7	4.9	417	112
210226-3	86	female	61	3.9	2.2	1.04	4.7	0.8	0.340426	146.952	101.25	1	2.7	3.8	0.48	1	3.2	40	0.6	18.9	19.1	5.1	12.9	0.901	1	0.69	0.48	<1				1	9	1	1	0	1	0	0	1	103	200.63	1.23	40.7	0.24	19.2		579
210304-3	87	female	74	3.2	2.25	0.9	4.7	1	0.425532	153.416	109.37	1	2.5	3.6	0.5	1.1			0.9	20.7	22.3	6.2	5.9	0.273	0	0.775	0.5	<1	0.081	<1	6	1	6	0	1	0	0	0	0	1	69	1594.95		41.4		22		778
210310-06	88	female	60	4.46	2.91	1.14	5.18	0.96	0.370656	205.968	143.81	1	2.71	4.2	0.86	1.38	2.74	30	1.17	21.1	18.6	6	20.2	0.779	0	0.78	0.86	<1				1	11	1	0	0	0	0	0	1	118	657.4				24.5	6.1	881	261
210225-22	89	female	68	4.7	2.5	1.54	5.6	1.39	0.496429	370.869	202.96	1	2.7	4.82		2.4	23	26	0.8	26.1	33.6	7.7	11.2	0.729	0	0.63		<1				1	2	1	0	0	0	0	0	1	106	295.67		43.2	0.28	24.7	8.6	836	337
210311-8	90	female	44	2.4	1.6	0.8	3.9	0.7	0.358974	82.2566	58.98	0	2	2.3	0.6	1.5			0.8	19	18.8	5.3	16.8	1.173	1	0.7	0.6	<1		<1		1	16	1	1	0	1	0	1	1	107	191.19		39.5	0.24	21.1	7	849	474
210302-6	91	female	70	4.1	2.5	1.24	5.7	1.12	0.392982	282.16	161.37	1	2.5	4.2	0.77	1.79	2.5	26	1.18	24.4	29.4	6.9	19.7	0.846	0	0.74	0.77	<1	0.048	<1	16	1	3	1	0	0	0	0	1	1	107	402.38	2.4	39.7	0.16	18.7	6.8	1028	404
210316-07	92	female	55	4.1	2.8	1.24	4.4	1.11	0.504545	185.606	106.35	1	2.3	3.4	0.7	2.1			1	25.8	30.2	7.5	6	0.592	0	0.72	0.7	<1	0.07	<1	9	1	9	0	0	0	0	0	0	1	75	327.48	11.3	42.5	0.33	26.4	12.9	1107	568
210226-10	93	female	34	3.1	2.1	1.02	4.3	0.76	0.353488	121.447	83.48	0	2	3	0.8	1.45			0.9	20.5	21.6	6	15.8	1.072	0	0.73	0.8	>1				0	13	1	0	0	0	0	1	1	115	322.2	0.79	50.6	0.39	14.8		691
210309-9	94	female	75	4.7	2.6	1.25	4.2	1.31	0.62381	195.977	127.03	1	2.14	3.8	1.01	1.9	3	35	1	17.7	27	5.3	4.4	0.412	1	0.6	1.01					0	12	1	0	0	0	0	0	1	77	1629.21	5.48	37.6	0.22	19.4		606
210315-19	95	female	46	4.4	3.1	0.96	6	0.93	0.31	229.541	140.88	1	2.9	4.6	1.2	1.5	2.95	35	1	24.7	26.9	7.3	19.3	1.076	0	0.76	1.2	>1	0.068	<1	17.6	1	3	1	0	0	0	0	1	1	113	664.72	3.52	41.1	0.36	25.2	22.1	1073	872
210309-11	96	female	77	3.3	2.25	1.2	4.4	1.1	0.5	179.962	103.53	1	3.2	3.4	0.45	1.3			0.9	22.7	29.2	6.8	11.9	0.538	0	0.73	0.45	<1	0.05	<1	9	1	4	1	0	0	0	0	0	0	142	419.64	6.26	39.2	0.28	19.9		810
210225-25	97	female	47	3.8	2.4	1.02	4.4	0.91	0.413636	140.752	103.62	1	2.3	3.1	0.94	1.5			1.15	16.9	18.4	4.8	13.1	0.89	1	0.66	0.94	<1	0.05	<1	16.8	1	23	1	1	0	1	0	1	1	101	82.6		47.7	0.43	26.2		858
210224-29	98	female	46	3.4	2.3	1	4.3	0.91	0.423256	133.7	95.63	1	2.3	3.6	0.9	1.2			1	17.1	18.4	5.1	15.6	1.136	1	0.67	0.9	1		<1		0	5	1	0	0	1	0	1	1	130	91.63	0.82	46.7	0.38	25.2	5.4	922	239
210209-6	99	female	50	3	2.2	0.8	4.2	0.71	0.338095	93.8517	70.49	0	2	3.3	0.53	1.18	0.28	18	0.93	16.6	15.5	4.9	16.7	1.292	1	0.67	0.53	<1		<1		1	5	0	0	0	0	0	0	1	102	153.24	0.05	44.3	0.4	25.1	6.6	762	247
210223-20	100	female	43	3.4	2.2	1.1	4.33	0.92	0.424942	146.088	87.28	0	2.2	3.2	0.8	1.4			1	20.2	26	6	20.2	0.735	0	0.61	0.8	<1		<1		1	1	1	0	0	1	0	0	1	105	121.7	4.65	44.7	0.25	22.1	7.3	840	414
210220-22	101	female	37	2.77	2.2	0.73	4.39	0.63	0.287016	88.38	60.28	0	2.41	3.04	0.89	1.4	2.46	24	0.99	20.6	16.2	5.6	27.9	1.054	0	0.67	0.89	>1		>1		0	5	0	0	0	0	0	0	1	96	219.6	0.82	39.9	0.31	24.3	5.1	977	289
210319-13	102	female	31	3.61	2.7	1.09	5.07	0.91	0.358974	186.194	109.29	1	2.45	4.03	0.69	1.49	2.48	25	1.03	26.8	21.6	6.6	22.6	1.056	0	0.62	0.69	<1				1	2	1	0	0	0	0	1	1	84	345.99	0.95	40.2	0.34	27.1	10.8	772	303
210223-22	103	female	57	4.6	2.5	1.27	5	1.11	0.444	231.02	143.89	1	2.5	4.2	1.1	1.6	2.1	18	1.3	23.2	18.8	5.9	17.8	0.736	0	0.637	1.1	>1	0.05	<1	20.2	1	2	1	0	1	1	0	1	1	95	637.04	12.95	39.4	0.18	12.2		571
210205-15	104	female	45	3.39	2.73	0.94	4.03	1.1	0.545906	132.22	85.93	0	2.41	4.35	0.59	1.37	2.54	26	0.84	20.1	20.8	5.6	27.5	1.17	0	0.65	0.59	1		<1		0	12	1	0	0	0	0	0	1	92		1.44	36.3	0.24	33.1	8.8	950	301
210302-7	105	female	51	3.57	2.47	1.08	5.26	1.02	0.387833	211.226	150.53	1	2.78	3.91		1.24	2.59	27	0.99	18.4	17.6	5.4	16.4	1.18	1	0.57		<1				1	4	1	0	0	0	0	0	1	90	657.94				32.6	8.3	886	265
210311-11	106	female	89	3	2	0.9	4.2	0.9	0.428571	118.671	92.35	0	2.6	3		1.4	2.99	36	0.9	15	18.2	4.6	8.3	0.67	1	0.71		<1		<1		1	4	1	0	0	1	0	0	1	121	1030.6	6.6	36.8	0.3	22.9	14	729	543
210205-7	107	female	44	3.36	1.98	1.17	4.28	0.96	0.448598	154.497	105.2	1	2.38	3.02	0.51	1.37	2.42	23	1.19	16.9	18.7	4.7	24.7	1.17	0	0.69	0.51	>1		<1		0	14	0	1	0	0	0	0	1	107	161.19		40.5	0.42	25.6		828
210309-18	108	female	63	3.7	2.1	1.12	4.7	1.01	0.429787	179.304	123.2	1	1.9	2.9	1	1.2			0.9	20.4	20.5	5.7	18.6	0.872	0	0.7	1	<1		<1		1	5	1	0	0	1	0	0	1	83	696.68	0.43	39.2	0.34	22.6		855
210209-5	109	female	38	3.5	2.1	0.8	4.7	0.9	0.382979	132.323	88.32	0	1.9	3.1	0.44	1.1	1.7	12	0.7	21.4	20.1	5.9	28.3	1.002	0	0.71	0.44	<1		<1		1	5	0	0	0	0	0	0	1	114	387.54	0.78	43.4	0.33	27		792
210223-10	110	female	56	2.9	2.1	1.24	4.5	0.98	0.435556	177.266	116.48	1	1.8	3.1	0.5	1.2			1.1	23.6	17.3	6.4	18.1	1.065	0	0.69	0.5	<1		<1		1	38	1	0	0	0	0	0	0	73	187	0.95	35.7	0.24	29.1	5.6	779	186
210209-13	111	female	68	3.93	2.58	1.1	4.25	1.03	0.484706	152.796	93.96	0	2.46	4.59		1.22			1.2	21	26.4	6.8	13.5	0.775	0	0.74		<1				1	4	0	1	0	0	0	0	1	132	139.41		44		18.5		728
210315-11	112	female	74	4.2	2.36	1.1	4.31	1	0.464037	153.115	90.75	0	2.4	3.1	0.67	1.9			0.84	20.2	26.8	6.1	14.1	0.443	0	0.6	0.67	<1		<1		1	2	1	1	0	1	1	1	1	103	68.24		37.9	0.27		7.4		135
210205-12	113	female	59	4.28	2.58	1.06	5.57	0.92	0.330341	214.89	155.58	1	2.75			1.8			1	20.7	18.6	5.9	21.9	0.725	0	0.5		>1				0	11	1	0	0	0	0	0	1	88	886.59		42.1	0.32	16.1		495
210317-16	114	female	75	5.07	2.84	1.3	4.6	1.37	0.595652	239.305	138.63	1	2.65	4.3		2.3	2.4	22	1.02	24.2	23.7	6.8	16.7	0.662	0	0.76						0	3	1	1	0	0	0	1	1	88	47.5	41.6	25.1	0.12	9.8	4.6	407	172
210309-22	115	female	79	5.23	2.73	1.1	4.3	1	0.465116	152.554	102.12	1	2.35	4.2			3.4	47	0.97	21.7	17.3	5.9	14.4	0.601	0	0.67		<1				1	6	0	1	0	1	0	1	1	101	147.58		41.2		9.2	36.6	226	687
210302-17	116	female	71	4.5	3.1	1.2	5.5	1	0.363636	242.011	135.79	1	4.4	4.4	0.75	1.5			1.1	25.8	26.7	7.2	11.3	0.313	0	0.68	0.75	<1	0.039	<1	19	1	6	1	1	0	0	0	0	1	93	650.29	12.6	43	0.24	21	7	835	342
210303-17	117	female	56	3.4	1.87	0.93	3.89	0.94	0.48329	110.623	75.87	0	1.9	3.42		1.17			0.98	18.9	23.1	5.7	10.3	0.858	0	0.64		<1				1	9	1	0	0	0	0	1	1	107	142.8	1.32	40.3	0.34	23.2	5.5	1088
210224-28	118	female	56	4.1	2.55	1.02	5.8	0.95	0.327586	228.556	173.1	1	3.09	3.8	1.26	1.56	3.3	45	1.49	19.5	16.7	5.7	21.9	1.06	0	0.8	1.26	1	0.05	<1	25	1	17	1	0	0	1	0	0	1	102	0.78	0.22	38.5	0.21	30.3	7.6	736	246
210205-17	119	female	48	3.85	2.2	1.2	5	1.2	0.48	233.746	155.7	1	2.7	4.53	1.31	2.25	2.8	15	1.31	22	19.8	6.1	26.3	1.091	0	0.77	1.18	>1	0.07	<1	18	1	12	1	0	0	1	0	1	1	114	587.51	2.9	42.8	0.32	27.6		790
210310-07	120	female	49	3.9	2.4	1.2	5	1.05	0.42	213.657	123.93	1	2.6	4		1.3	0.7	23	0.7	22.3	27.4	6.5	25.8	0.951	0	0.73		>1				0	8	1	0	0	0	0	1	1	137	662.8				19.9	6.3	994	360
210310-20	121	female	61	3.32	1.98	0.91	4.06	0.89	0.438424	112.343	75.29	0	2.15	3.3	0.49	1.17			0.89	16.1	21.3	4.8	6.5	0.793	1	0.72	0.49	<1				1	4	1	0	0	1	0	1	1	108	64.78	6.58	34.2	0.22	29.9	14.1	764	359
210222-5	122	female	58	3.17	2.65	1.17	4.97	0.97	0.390342	197.503	121.03	1	2.7	3.6	0.6	1.3			1.1	23.3	24.7	6.5	20.4	0.778	0	0.7	0.6	1				0	10	1	0	0	0	0	1	1	91	5.41	10.8	38.4		25	6.5	743
210304-4	123	female	58	3.8	2.3	0.97	4.9	0.97	0.395918	168.967	125.14	1	2.4	2.4	1.06	1.86	3.2	41	0.99	16	19	4.7	8	0.772	1	0.76	1.06	<1	0.049	<1	21.6	1	5	0	0	0	0	0	0	1	97	350.24	0.83	37.3	0.29	30		820
210220-21	124	female	37	3.9	2.65	1.2	4.32	1.08	0.5	172.72	108.14	1	2.55	3.95	1.07	1.55	2.02	16	1.27	22.8	21.9	6.3	28.4	1.208	0	0.673	1.07	<1		<1		1	4	1	0	0	0	0	1	1	90	1335.5	0.81	39.7	0.33	24	9	1091	413
210226-7	125	female	31	3.7	2.6	0.96	3.8	0.94	0.494737	109.027	67.29	0	2.1	3.6	0.5	1.4			0.94	22.3	25.3	6.5	35.6	1.246	0	0.68	0.5	<1		<1		1	8	0	0	0	0	1	1	1	92	460.9	1.2	41.6	0.33	30.5		1295
210225-8	126	female	67	4.6	2.57	1.07	5.5	0.6	0.218182	168.853	112.53	1	2.61	3.52	1.65	1.37	3.7	55	0.77	17.2	22.1	5.2	17.6	0.776	1	0.77	1.65	<1	0.035	<1	47	1	9	1	1	0	0	0	1	1	139	185.7		40.3	0.31
210222-11	127	female	51	4	2.3	1.1	5.2	1	0.384615	207.276	144	1	2.6	4.1	0.7	1.6	2.8	31	1.2	21.4	19.3	5.9	31.4	0.816	0	0.66	0.7	<1	0.051	<1	14	1	4	1	0	0	0	0	0	1	88	33.93	0.89	44.1	0.31	23.1		1018	235
210224-30	128	female	57	4.1	2.7	1.03	4.6	1.1	0.478261	173.228	113.93	1	1.8	3.4	0.8	1.5			0.8	20.2	21.3	5.8	19.9	1.304	0	0.685	0.8	<1		<1		1	5	1	0	0	0	0	0	1	125	179.78		42.8	0.4	23.8	8.8	985	346
210319-22	129	female	58	4.5	2.4	1	5.5	1	0.363636	213.176	139.37	1	2.4	4.1	0.8	1.6	2.74	4	1	19.3	20	5.6	11.9	1.055	1	0.79	0.8	<1		<1		1	1	1	0	0	1	0	1	1	72	64.17	0.82	29.6	0.3	10.9	10.2	366	190
210319-20	130	female	69	4.2	2.3	1.27	4.5	0.92	0.408889	173.9	121.73	1	2.7	3.3	0.79	1.29			1.25	23.3	20.5	6.5	10.8	0.879	0	0.7	0.79	<1		<1		1	1	1	0	0	0	0	1	1	88	439.6	5.26	35.5	0.16	16.8	15.5	611	461
210310-16	131	female	65	3.5	1.9	1.1	4	1	0.5	136.2	100.06	1	2.6	3.2	0.72	1.6	2.3	21	1.45	18.8	20.8	5.8	7.6	0.557	0	0.8	0.72	>1	0.045	<1	16	1	4	1	0	0	1	0	1	1	87	428.59	1.11	33.9	0.25	26.1	11.8	924	443
210208-3	132	female	55	4.03	2.44	1.23	4.77	1.11	0.465409	209.344	135.64	1	2.27	3.6	0.93	1.48	2.7	29	1.04	23.9	23	6.6	54.8	1.07	0	0.67	0.93	<1		<1		1	11	1	0	0	1	0	1	1	98	576.61	0.82	44.2	0.36	26.7		951
210310-03	133	female	55	3.1	2.4	1.15	4.4	1.07	0.486364	171.105	113.74	1	2.4	3.4	0.7	1.5	2.3	20	1.4	19.8	19.5	5.4	12	0.889	1	0.79	0.7	<1		<1		1	15	1	0	1	0	0	0	1	131	366.4	0.79	42.7	0.42	17.4	11.7	803	568
210312-11	134	female	52	4.1	3.5	1.18	4.4	1.2	0.545455	189.033	123.68	1	2.3	3.5	0.88	1.29	2.5	25	0.77	24.5	22.6	6.9	20.1	0.843	0	0.66	0.88	1	0.04	<1	22	1	19	0	0	0	0	0	0	1	128	407.1		46.7	0.5	14.5	7.3	630	326
210224-11	135	female	50	3.09	2.28	0.81	4.06	0.82	0.403941	98.1908	62.82	0		3.5	0.57					20.7	24.1	6.1	43.2	0.976	0	0.62	0.57	<1				1	16	1	0	0	0	0	0	1	105	1115
210205-13	136	female	59	4.6	2.9	1.23	4.9	1.28	0.522449	241.231	173.21	1	3	3.7	0.6	1.13	1.88	14	0.81	21.5	20.4	5.9	15.6	0.713	0	0.67	0.6	<1	0.06	<1	10	1	9	1	0	0	0	0	0	1	92	405.44	14.27	41.6		23.5		642
210222-6	137	female	70	4.5	2.9	1.2	5	1.27	0.508	243.405	173.34	1	2.3	4	0.6	1.4	3.3	44	0.9	21.3	21.7	6.4	22.4	0.822	0	0.6	0.6	<1	0.03	<1	20	1	5	1	0	0	1	0	1	1	104	176.3	0.14	43.4	0.3	27.8		977
210312-15	138	female	44	2.89	0.93	1.14	3.46	1.1	0.635838	120.218	91.85	0	2.18	2.65	0.4	1.3	2.13	18	1.05	17	16.5	4.8	20.6	1.01	0	0.74	0.4	<1				1	8	0	0	0	0	0	0	1	99	411.9	1.21	46.1	0.45	21.4		634
210219-20	139	female	47	4.5	2	1.3	4.7	1.2	0.510638	224.762	151.75	1	2.4	3.5		1.7	3.5	48	1.2	20.1	22.4	6.1	14.8	0.954	0	0.67						0	4	1	0	0	0	0	1	1	110	341.46				17.5	5.4	813	302
210220-8	140	female	65	4.1	2.8	1.1	5	1.03	0.412	198.173	121.13	1	2。6	3.9	0.47	1.19	2.5	25	0.96	22	24.8	6.3	15.3	0.81	0	0.68	0.47	<1	0.06	<1	8	1	9	1	0	0	1	0	1	1	106	232.31		38.2		30.6	8.5	922	287
210209-9	141	female	53	4	2.4	1.1	4.2	0.98	0.466667	145.023	98.13	1	2.3	4	1.3	1.6	2.5	25	1.1	20.7	23.5	6.4	20.8	1.12	0	0.7	1.3	1		<1		0	15	1	0	0	0	0	1	1	100	1.98		44.6	0.35	512		883
210218-11	142	female	60	3.93	2.57	1.21	4.64	0.82	0.353448	164.374	106.51	1	2.54	3.64	0.9	1.68	2.9	34	0.97	21.5	20.7	6.1	18.1	0.909	0	0.76	0.9	1		<1		0	5	1	0	0	1	0	0	1	108	468.14	20.1	37.2	0.29	34.1	10.4	905	360
210226-6	143	female	33	3.41	2.51	0.78	4.7	0.9	0.382979	130.285	90.16	0	2.04	3.34	1.03	1.65	2.75	30	1.22	20.1	18.9	5.7	25.6	1.106	0	0.73	1.03	>1	0.1	<1	10.3	0	4	1	1	0	1	0	1	1	109	72.9	3.47	42.7	0.41	31.5		1059
210303-9	144	female	59	3.8	2.5	1.4	4.7	1.1	0.468085	224.762	145.7	1	2.8	3.4	0.7	1.2	2.2	19	0.8	19.9	21	5.4	24.2	0.793	1	0.59	0.7	<1		<1		1	5	1	1	0	0	0	0	1	106	149.41				28.1		813
210223-24	145	female	57	3.6	2.4	0.73	4.9	0.83	0.338776	127.012	86.01	0	2.5	3	0.7	1.7	1.9	14	0.9	18.9	22.3	5.6	17.3	1.107	1	0.64	0.7	<1	0.05	<1	12	1	15	1	0	0	0	1	1	1	99		8.96	36.9	0.28	29.4	6.2	890	279
210319-7	146	female	82	3.6	2.2	0.9	3.9	0.88	0.451282	103.711	78.21	0	2.1	3.3	0.9	1.3	3.3	42	1	12.7	18	3.8	6.3	0.339	1	0.68	0.9	<1		<1		1	3	0	0	0	1	0	0	1	75	19.86	16.8	32.8	0.16	22.2	5.7	662	266
210312-4	147	female	80	4.8	2.4	1.22	5.4	1.16	0.42963	261.388	157.77	1	3.2	4.2	1.37	2.36	3.4	45	1.35	21.7	31.6	6.9	28.2	0.375	0	0.7	1.37	>1		<1		0	5	1	1	1	0	0	1	1	90	197.64		42.4		29.8	9.1	837	267
210311-10	148	female	78	4.5	2.6	1.4	4.5	1.4	0.622222	248.446	165.46	1	2.6	4.5	1	1.29	2.43	24	1.23	20.2	20.7	5.4	13.3	0.452	1	0.68	1	>1	0.08	>1	12.5	0	5	1	0	0	1	0	0	1	104	1388.96	0.79	38.6	0.29	23.9	5.9	702	196
210223-23	149	female	46	3.5	2.4	0.9	5.1	0.9	0.352941	163.554	100.88	1	2.1	3.7	0.6	1.3			1.1	21.5	24.3	6.3	22.5	1.002	0	0.7	0.6	<1		<1		1	9	1	0	0	0	1	1	0	115	272.44	0.82	44.9	0.43	26.2	7.6	1001	379
210315-7	150	female	33	3.6	2.7	1.07	4.5	0.96	0.426667	156.45	107.27	1	2.3	3.2	0.7	1.4	2.1	17	0.9	21.7	19	6	10.9	1.098	0	0.77	0.7	>1	0.06	<1	11	0	6	1	0	0	0	0	1	1	100	349.84	1.24	40.7	0.36	22.4	13.6	1120	762
210209-14	151	female	55	3.6	2.3	0.72	4.5	0.72	0.32	99.1584	71.05	0	1.9	3.2	0.9	1.5	2.9	33	1.3	16.4	22	5	26.1	0.875	0	0.66	0.9	1		<1		0	14	1	0	0	0	0	1	1	118	35.18	1.36	44.2	0.38	13.1		558
210303-14	152	female	77	3.44	2.36	1.19	4.03	0.9	0.44665	136.857	98.06	1	2.3	3.09	0.44	1.33	2.3	21	1.01	16.7	21.9	5	11.1	0.528	1	0.64	0.44	<1		<1		1	3	1	0	0	1	0	0	1	100	1379.63		39.9	0.34	11.6		546
210226-9	153	female	84	3.9	2.2	1.2	4.6	1.3	0.565217	217.398	137.22	1	2	3.3	1.2	2.1	2.1	18	1.4	18.4	25.8	5.7	11.8	0.613	0	0.63	1.2	<1	0.03	<1	40	1	2	1	1	1	1	0	0	1	93	243.75	33.05	41.5	0.22	16.1	4.7	658	211
210316-08	154	female	75	4.2	2.4	1.1	4.4	1.01	0.459091	159.271	94.22	0	2.6	4.1	0.7	1.4			0.7	22	26.4	6.1	3.3	0.712	0	0.75	0.7	<1	0.05	<1	14	1	3	1	0	0	0	0	0	1						9		319
210310-21	155	female	51	5.09	2.91	1.31	5.83	1.23	0.421955	323.6	220.15	1		4.06			3.58	51.3		21.2	19.8	5.9	10.3	0.882	0	0.499		1				0	12	0	0	0	0	0	0	1	107	628.36	7.16	40.2	0.34	20.8	5.3	769	259
210218-6	156	female	64	4.1	2.65	1.05	5.5	1.1	0.4	234.66	149.97	1	2.2	3.6	1.4	2.3	3.2	21	1.4	22	23.6	5.9	19.4	0.805	0	0.726	1.4	>1	0.03	<1	46	1	9	0	0	0	0	0	0	1	114	283.49		42.7	0.3	24.9	7	772	216
210219-5	157	female	51	3.4	1.8	0.86	4.22	0.72	0.341232	100.407	66.57	0	2.19	3.77	1.27	2.05	2.82	32	1.25	21.7	25.8	7.3	17.7	1.052	0	0.77	1.27	<1	0.07	<1	18	1	11	0	0	0	1	1	0	1	98	521.71		38.8	0.39	29		897
210208-4	158	female	44	2.09	2.09	0.86	3.36	0.78	0.464286	73.0397	46.87	0	1.97	3.16	0.46	1.25	2.25	20	1	22.8	22.5	6.3	38	0.983	0	0.7	0.46	<1		<1		1	7	1	0	0	0	0	1	1	125	661.81	6.59	45	0.34	33.2		1227
[truncated: 18 more columns]
